# Supplementary material for: Motor phenotype is not associated with vascular dysfunction in symptomatic Huntington’s disease transgenic R6/2 (160 CAG) mice
Source: PubMed Central journal article supplement (PMC5314343; doi:10.1038/srep42797), 2017-02-17
Supplement: srep42797-s1.pdf [file srep42797-s1.pdf]

## Supplementary Information

### **Motor phenotype is not associated with vascular dysfunction in symptomatic Huntington's disease transgenic R6/2 (160 CAG) mice.**

Di Pardo A<sup>1</sup>, Carrizzo A<sup>1</sup>, Damato A<sup>1</sup>, Castaldo S<sup>1</sup>, Amico E<sup>1</sup>, Capocci L<sup>1</sup>, Ambrosio M<sup>1</sup>, Pompeo F<sup>1</sup>, De Sanctis C<sup>1</sup>, Puca AA<sup>2,3</sup>, Remondelli P<sup>3</sup>, Maglione V<sup>1\*</sup> and Vecchione C<sup>1,3\*</sup>.

<sup>1</sup> IRCCS Neuromed, Pozzilli (Italy) <sup>2</sup> IRCCS Multimedica, Milano (Italy) <sup>3</sup> University of Salerno, Salerno (Italy)

\*Correspondence to:

Carmine Vecchione, IRCCS Neuromed,  
Vascular Physiopathology Unit,  
Loc. Camerelle, 86077, Pozzilli (IS), Italy.  
University of Salerno,  
Department of Medicine and Surgery,  
via Allende, 84084, Baronissi (SA), Italy.  
E-mail [cvecchione@unisa.it](mailto:cvecchione@unisa.it)

and

Vittorio Maglione, IRCCS Neuromed,  
Centre for Neurogenetics and Rare Disease,  
Loc. Camerelle, 86077, Pozzilli (IS), Italy.  
E-mail: [vittorio.maglione@neuromed.it](mailto:vittorio.maglione@neuromed.it)

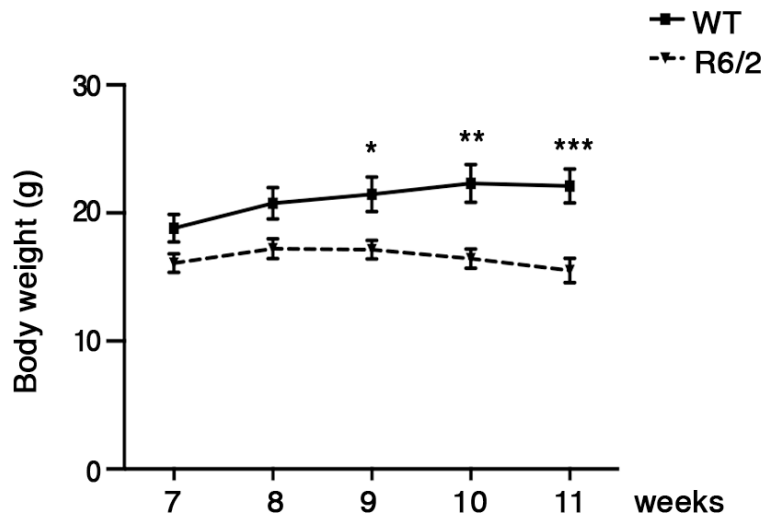

**Supplementary Figure 1. Body weight.** Body weight measurement in symptomatic R6/2 mice and WT littermates. Each data point represents the average performance  $\pm$  S.E.M. of 6 mice for each group. \*,  $P < 0.05$ ; \*\*,  $P < 0.001$ ; \*\*\*,  $P < 0.0001$ . Two-way ANOVA with Bonferroni post-test. Interaction,  $F(4, 40) = 34.27$ ;  $p < 0.0001$ . Complete tabular statistics for ANOVA is reported in the Supplementary Table 2.

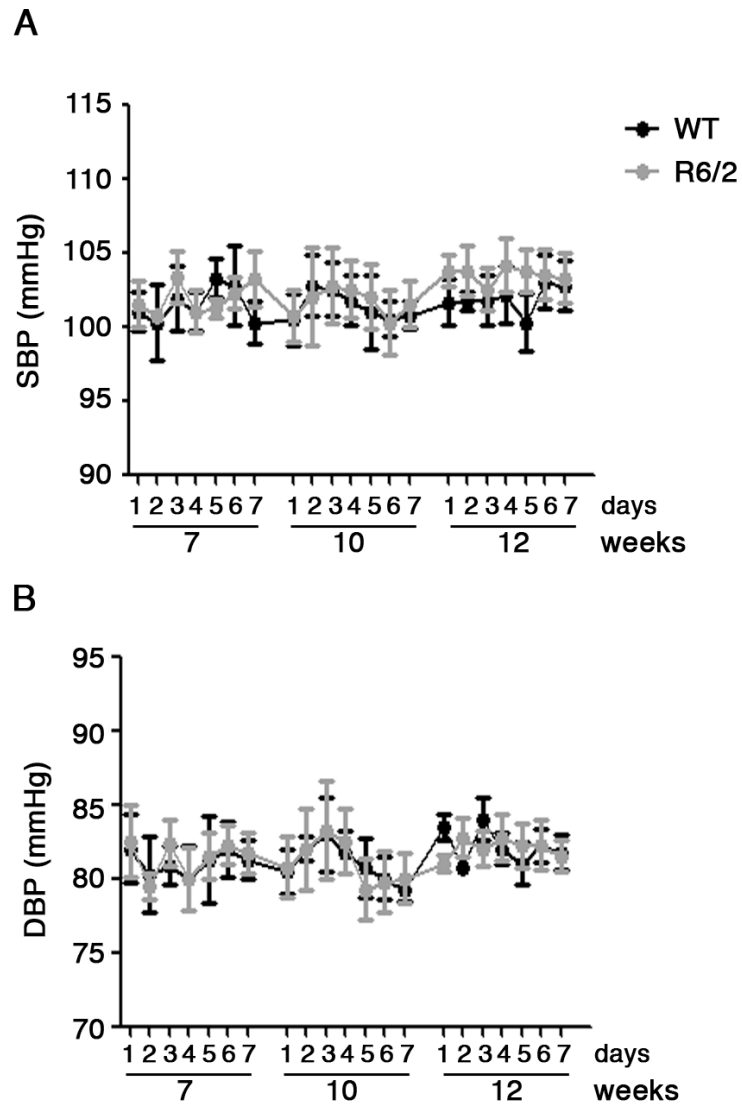

**Supplementary Figure 2. Measurement of blood pressure in HD mice.** Systolic (SBP) (A) and Diastolic blood pressure (DBP) in 7, 10 and 12 weeks old R6/2 mice and age-matched WT littermates. N=6 for each groups. Two-way ANOVA, Bonferroni post-test. SBP; F= 0,6037. DBP; F= 0,5026

**Supplementary Table 1.** Tabular results for Two Way ANOVA reported in Figure 1

| 2way ANOVA<br>Tabular results |                      |          |                 |                    |            |
|-------------------------------|----------------------|----------|-----------------|--------------------|------------|
| Table Analyzed                | Rotarod              |          |                 |                    |            |
| Two-way RM ANOVA              | Matching: Stacked    |          |                 |                    |            |
| Alpha                         | 0.05                 |          |                 |                    |            |
| Source of Variation           | % of total variation | P value  | P value summary | Significant?       |            |
| Interaction                   | 4.407                | < 0.0001 | ****            | Yes                |            |
| weeks                         | 1.511                | 0.0290   | *               | Yes                |            |
| genotype                      | 68.00                | 0.0002   | ***             | Yes                |            |
| Subjects (matching)           | 21.07                | < 0.0001 | ****            | Yes                |            |
| ANOVA table                   | SS                   | DF       | MS              | F (DFn, DFd)       | P value    |
| Interaction                   | 182.7                | 4        | 45.69           | F (4, 40) = 8.796  | P < 0.0001 |
| weeks                         | 62.64                | 4        | 15.66           | F (4, 40) = 3.015  | P = 0.0290 |
| genotype                      | 2820                 | 1        | 2820            | F (1, 10) = 32.28  | P = 0.0002 |
| Subjects (matching)           | 873.7                | 10       | 87.37           | F (10, 40) = 16.82 | P < 0.0001 |
| Residual                      | 207.8                | 40       | 5.194           |                    |            |
| Number of missing values      | 0                    |          |                 |                    |            |

| 2way ANOVA<br>Tabular results |                      |          |                 |                    |            |
|-------------------------------|----------------------|----------|-----------------|--------------------|------------|
| Table Analyzed                | Horizontal           |          |                 |                    |            |
| Two-way RM ANOVA              | Matching: Stacked    |          |                 |                    |            |
| Alpha                         | 0.05                 |          |                 |                    |            |
| Source of Variation           | % of total variation | P value  | P value summary | Significant?       |            |
| Interaction                   | 8.710                | < 0.0001 | ****            | Yes                |            |
| weeks                         | 6.049                | 0.0010   | ***             | Yes                |            |
| genotype                      | 69.17                | < 0.0001 | ****            | Yes                |            |
| Subjects (matching)           | 5.466                | 0.0519   | ns              | No                 |            |
| ANOVA table                   | SS                   | DF       | MS              | F (DFn, DFd)       | P value    |
| Interaction                   | 428.8                | 4        | 107.2           | F (4, 40) = 8.210  | P < 0.0001 |
| weeks                         | 297.8                | 4        | 74.44           | F (4, 40) = 5.701  | P = 0.0010 |
| genotype                      | 3405                 | 1        | 3405            | F (1, 10) = 126.6  | P < 0.0001 |
| Subjects (matching)           | 269.1                | 10       | 26.91           | F (10, 40) = 2.061 | P = 0.0519 |
| Residual                      | 522.3                | 40       | 13.06           |                    |            |
| Number of missing values      | 0                    |          |                 |                    |            |

**Supplementary Table 2.** Tabular results for Two Way ANOVA reported in Supplementary Figure 1

| 2way ANOVA<br>Tabular results |                      |          |                 |                    |            |
|-------------------------------|----------------------|----------|-----------------|--------------------|------------|
| Table Analyzed                | Body Weight          |          |                 |                    |            |
| Two-way RM ANOVA              | Matching: Stacked    |          |                 |                    |            |
| Alpha                         | 0.05                 |          |                 |                    |            |
| Source of Variation           | % of total variation | P value  | P value summary | Significant?       |            |
| Interaction                   | 4.215                | < 0.0001 | ****            | Yes                |            |
| weeks                         | 3.983                | < 0.0001 | ****            | Yes                |            |
| genotype                      | 43.61                | 0.0123   | *               | Yes                |            |
| Subjects (matching)           | 46.97                | < 0.0001 | ****            | Yes                |            |
| ANOVA table                   | SS                   | DF       | MS              | F (DFn, DFd)       | P value    |
| Interaction                   | 30.83                | 4        | 7.707           | F (4, 40) = 34.27  | P < 0.0001 |
| weeks                         | 29.14                | 4        | 7.284           | F (4, 40) = 32.39  | P < 0.0001 |
| genotype                      | 319.0                | 1        | 319.0           | F (1, 10) = 9.285  | P = 0.0123 |
| Subjects (matching)           | 343.5                | 10       | 34.35           | F (10, 40) = 152.7 | P < 0.0001 |
| Residual                      | 8.997                | 40       | 0.2249          |                    |            |
| Number of missing values      | 0                    |          |                 |                    |            |
